# Supplementary material for: Role of DNA sequence in chromatin remodeling and the formation of nucleosome-free regions
Source: PubMed Central journal article supplement — Genes Dev. 2014 Nov 15;28(22):2492–7. doi: 10.1101/gad.250704.114 (PMC4233242; doi:10.1101/gad.250704.114), 2014-11-15
Supplement: supp_28.22.2492_Table_S1.pdf [file supp_28.22.2492_Table_S1.pdf]

Table S1 DNA sequences of nucleosome-free regions

**TUB2**

CTCTTCTTTTTCTTTATTCCCCCATGGGCCAAAAAAAAATAGTACTATCAGGA  
ATTTGGCGCCGGGTCACGATATACGTGTACAGTGACCTAGGCGACGCCACAA  
GGAAAAAGGAAAAAACAGAAAAACAACAAAACTAAAACAAACACGAA  
AACTTT

**FMP32**

GCAGCTGTTTCAAGTTCTTTTTTTATTGGAGATATAATTATTTACATTATTGTT  
ATAGAGGACACACGAAAAAGCAAGAAGGGA ACTATAAGAAAAATAAAAA  
TAATGAAGAATACAGATCTGTAATTAGTCATTTCAAGTGAGCGTAATAAGTA

**SEC53**

AACACGTAAAAACGGCACATTTTAATATATTTCAAATTTTTTTTTTCATCAAC  
GACAAAAGGAATGCATTTTATCCACTTTTCGTGTCTCATGACGAGTATACCGA  
TAAACGCCAAATGCGTATTTTATTATCTATTTTGGCCAAAATCAACG

**FET5**

TATTACTTTGTGGCTTTTGTATTCAGTCTGCACCCTGTTTCGCCATCGATTCTT  
ATAATACATACATTTTATATAAGATCACAGAAAATACGAAGAGTAAAAAAA  
GAGTTCCGAATGAAAGAAGAAAGAATCAAGCACAGGAAGACAAGAAACGAT  
GTT

**RGD2**

TATAATTATTCAATACCAATTAAGGCTTCTATTAAGATCAAAAACATTCTT  
AGAGTTCATACTGTTTCTCTACTCGTGTATAGTGATACCAAGACGTAATGACA  
ATAATAGATGGAAATTGAAATATTATGAAACAGGAATAATATTCCGTTGAAT  
T

**SWP82**

CTGTGCATTAAATATAGTTGTAGTTTCAGCCGTCTATATTTTTTTTTTCGAACCA  
TCACTTTTCCCTTCTGGACTTTTCTCAATGTAAAAACAAGAAAAACATGGAT  
GTATAATACTATAAATAAAAAAAGTAGGAAGAAGAACC AAAACAAAGGGCG

T

**HIS3**

TCTATTACTCTTGGCCTCCTCTAGTACACTCTATATTTTTTTATGCCTCG  
GTAATGATTTTCATTTTTTTTTTCCACCTAGCGGATGACTCTTTTTTTT  
TCTTAGCGATTGGCATTATCACATAATGAATTATACATTATATAAAGT  
AATGTGATTCT

**ILV1**

TATTGCATATTATCTCTGCTATTTTGTGACGTTCAATTTTAATTGACGC  
GAAAAAGAAAAAATAAGAAGGGCAAAAAGAAAAAGCGCAGCGGGT  
AGCAAATTTGGAATCGCATAAAAAGAAAAAAAAAATATCAAAGAAA  
AAGAGTCATCTCAAACATAT

**SNT1**

ATCTTTACTTTTGAACTGATTTCTCATCCCATCTAGTATTGTAATTGC  
GTACGTATCCAATATCATTACCAACGCCGGGTATTTTTTTCTAGTATTT  
CTTCTCCATTTGCCTATGGAAAACGGCAAAAAGGGTAAAAGAAAAAA  
ACAAACGATTAATTC

**MRSP5**

TCGTATGTATCCCATACATTTATGTATCCCATATATTTTCATTACATGGT  
GATGCTTTCCTTTATTCGCGGAGTAAAGTTCCTTAAAGTGAAAAAAA  
AAAAGACGAATTGACAAGACAATAACAAGCACCCTAAAAGAC  
CTATCGTTATTGTTGTC
