# Supplementary material for: Role of DNA sequence in chromatin remodeling and the formation of nucleosome-free regions
Source: PubMed Central journal article supplement — Genes Dev. 2014 Nov 15;28(22):2492–7. doi: 10.1101/gad.250704.114 (PMC4233242; doi:10.1101/gad.250704.114), 2014-11-15
Supplement: supp_28.22.2492_Table_S2.pdf [file supp_28.22.2492_Table_S2.pdf]

Table S2. Nucleosomal DNAs (160 bp) containing poly(dA:dT)-tracts (highlighted) inserted in the 5S rDNA sequence. The left end of the nucleosome core particle begins after the sequence 5'-GAATTC.

**T<sub>7</sub> at position 29**

5'GAA TTC CAA CGA ATA ACT TCC AGG GAT TTA TAA GCT **TTT TTT** GTC  
ATA ACA TCC CTG ACC CTT TAA ATA GCT TAA CTT TCA TCA AGC AAG  
AGC CTA CGA CCA TAC CAT GCT GAA TAT ACC GGT TCT CGT CCG ATC  
ACC GAA GTC AAG CAG CAT ACC CGG G – 3'

**T<sub>7</sub> at position 36**

5'GAA TTC CAA CGA ATA ACT TCC AGG GAT TTA TAA GCC GAT GAC  
**TTTTTTT** CA TCC CTG ACC CTT TAA ATA GCT TAA CTT TCA TCA AGC AAG  
AGC CTA CGA CCA TAC CAT GCT GAA TAT ACC GGT TCT CGT CCG ATC  
ACC GAA GTC AAG CAG CAT ACC CGG G – 3'

**T<sub>7</sub> at position 45**

5'GAA TTC CAA CGA ATA ACT TCC AGG GAT TTA TAA GCC GAT GAC GTC  
ATA ACA T **TT TTT TT** C CTT TAA ATA GCT TAA CTT TCA TCA AGC AAG AGC  
CTA CGA CCA TAC CAT GCT GAA TAT ACC GGT TCT CGT CCG ATC ACC  
GAA GTC AAG CAG CAT ACC CGG G – 3'

**T<sub>7</sub> at position 60**

5'GAA TTC CAA CGA ATA ACT TCC AGG GAT TTA TAA GCC GAT GAC GTC  
ATA ACA TCC CTG ACC CTT TAT **TTT TTT T** TAA CTT TCA TCA AGC AAG AGC  
CTA CGA CCA TAC CAT GCT GAA TAT ACC GGT TCT CGT CCG ATC ACC  
GAA GTC AAG CAG CAT ACC CGG G – 3'

**T<sub>7</sub> at position 69**

5'GAA TTC CAA CGA ATA ACT TCC AGG GAT TTA TAA GCC GAT GAC GTC  
ATA ACA TCC CTG ACC CTT TAA ATA GCT TAA **TTT TTT T** TCA AGC AAG  
AGC CTA CGA CCA TAC CAT GCT GAA TAT ACC GGT TCT CGT CCG ATC  
ACC GAA GTC AAG CAG CAT ACC CGG G – 3'

**T<sub>10</sub> at position 28**

5'GAA TTC CAA CGA ATA ACT TCC AGG GAT TTA TAAGTTTTTTTTTC ATA  
ACA TCC CTG ACC CTT TAA ATA GCT TAA CTT TCA TCA AGC AAG AGC  
CTA CGA CCA TAC CAT GCT GAA TAT ACC GGT TCT CGT CCG ATC ACC  
GAA GTC AAG CAG CAT ACC CGG G – 3'

**T<sub>10</sub> at position 36**

5'GAA TTC CAA CGA ATA ACT TCC AGG GAT TTA TAA GCC GAT GAC  
TTTTTTTTT TCC CTG ACC CTT TAA ATA GCT TAA CTT TCA TCA AGC AAG  
AGC CTA CGA CCA TAC CAT GCT GAA TAT ACC GGT TCT CGT CCG ATC  
ACC GAA GTC AAG CAG CAT ACC CGG G – 3'

**T<sub>10</sub> at position 44**

5'GAA TTC CAA CGA ATA ACT TCC AGG GAT TTA TAA GCC GAT GAC GTC  
ATA AC TTTTTTTTTT CTT TAA ATA GCT TAA CTT TCA TCA AGC AAG AGC  
CTA CGA CCA TAC CAT GCT GAA TAT ACC GGT TCT CGT CCG ATC ACC  
GAA GTC AAG CAG CAT ACC CGG G – 3'

**T<sub>10</sub> at position 59**

5'GAA TTC CAA CGA ATA ACT TCC AGG GAT TTA TAA GCC GAT GAC GTC  
ATA ACA TCC CTG ACC CTT TA TTTTTTTTTT CTT TCA TCA AGC AAG AGC  
CTA CGA CCA TAC CAT GCT GAA TAT ACC GGT TCT CGT CCG ATC ACC  
GAA GTC AAG CAG CAT ACC CGG G – 3'

**T<sub>10</sub> at position 68**

5'GAA TTC CAA CGA ATA ACT TCC AGG GAT TTA TAA GCC GAT GAC GTC  
ATA ACA TCC CTG ACC CTT TAA ATA GCT TA TTTTTTTTTT AGC AAG AGC  
CTA CGA CCA TAC CAT GCT GAA TAT ACC GGT TCT CGT CCG ATC ACC  
GAA GTC AAG CAG CAT ACC CGG G – 3'

**T<sub>14</sub> at position 27**

5'GAA TTC CAA CGA ATA ACT TCC AGG GAT TTA TAA **TTTTTTTTTTTT TTA**  
ACA TCC CTG ACC CTT TAA ATA GCT TAA CTT TCA TCA AGC AAG AGC  
CTA CGA CCA TAC CAT GCT GAA TAT ACC GGT TCT CGT CCG ATC ACC  
GAA GTC AAG CAG CAT ACC CGG G – 3'

**T<sub>14</sub> at position 36**

5'GAA TTC CAA CGA ATA ACT TCC AGG GAT TTA TAA GCC GAT GAC  
**TTTTTTTTT TTT TT**G ACC CTT TAA ATA GCT TAA CTT TCA TCA AGC AAG  
AGC CTA CGA CCA TAC CAT GCT GAA TAT ACC GGT TCT CGT CCG ATC  
ACC GAA GTC AAG CAG CAT ACC CGG G – 3'

**T<sub>14</sub> at position 44**

5'GAA TTC CAA CGA ATA ACT TCC AGG GAT TTA TAA GCC GAT GAC GTC  
ATA AC**TTTTTTTTTTTTT**TAA ATA GCT TAA CTT TCA TCA AGC AAG AGC  
CTA CGA CCA TAC CAT GCT GAA TAT ACC GGT TCT CGT CCG ATC ACC  
GAA GTC AAG CAG CAT ACC CGG G – 3'

**T<sub>14</sub> at position 55**

5'GAA TTC CAA CGA ATA ACT TCC AGG GAT TTA TAA GCC GAT GAC GTC  
ATA ACA TCC CTG ACC C**TT TTTTTTTTTTTT**CTT TCA TCA AGC AAG AGC  
CTA CGA CCA TAC CAT GCT GAA TAT ACC GGT TCT CGT CCG ATC ACC  
GAA GTC AAG CAG CAT ACC CGG G – 3'

**T<sub>14</sub> at position 65**

5'GAA TTC CAA CGA ATA ACT TCC AGG GAT TTA TAA GCC GAT GAC GTC  
ATA ACA TCC CTG ACC CTT TAA ATA GC**T TTTTTTTTTTTTT**TGC AAG AGC  
CTA CGA CCA TAC CAT GCT GAA TAT ACC GGT TCT CGT CCG ATC ACC  
GAA GTC AAG CAG CAT ACC CGG G – 3'
