# Supplementary material for: Role of DNA sequence in chromatin remodeling and the formation of nucleosome-free regions
Source: PubMed Central journal article supplement — Genes Dev. 2014 Nov 15;28(22):2492–7. doi: 10.1101/gad.250704.114 (PMC4233242; doi:10.1101/gad.250704.114), 2014-11-15
Supplement: supp_28.22.2492_Table_S3.pdf [file supp_28.22.2492_Table_S3.pdf]

Table S3. Oligonucleotides

**Random**

TTCGAGGGAGCTTGCATGCCGGTCGACCACGAT  
ATCGTGGTCGACCGGCATGCAAGCTCCCTCGAA

**T<sub>4</sub>ACT<sub>7</sub>(PHO5)**

CACAATGCCAAAAAAGTAAAAGTGATTAA  
TTAATCACTTTTACTTTTTTTGGCATTGTG

**T<sub>3</sub>GT<sub>6</sub>(GAL2)**

CTGCGCAATGTTTGTTTTTTGAACAGTAGC  
GCTACTGTTCAAAAAACAAACATTGCGCAG

**T<sub>3</sub>CT<sub>6</sub>**

CTGCGCAATGTTTCTTTTTTGAACAGTAGC  
GCTACTGTTCAAAAAAGAAACATTGCGCAG

**HIS3**

GTAATGATTTTCATTTTTTTTTTTCCCCTA  
TAGGGGAAAAAAAAAAAAATGAAAATCATTAC

**DED1**

T<sub>3</sub>CCT<sub>6</sub>CT<sub>5</sub>GCT<sub>5</sub>CT<sub>9</sub>
