# Supplementary material for: Role of DNA sequence in chromatin remodeling and the formation of nucleosome-free regions
Source: PubMed Central journal article supplement — Genes Dev. 2014 Nov 15;28(22):2492–7. doi: 10.1101/gad.250704.114 (PMC4233242; doi:10.1101/gad.250704.114), 2014-11-15
Supplement: supp_28.22.2492_Table_S4.pdf [file supp_28.22.2492_Table_S4.pdf]

Table S4. Nucleosomal DNAs containing T-rich elements (highlighted).

**5S rDNA**

5' - GAATTCCAACGAATAACTTCCAGGGATTTATAAGCCGATGACGTCATAAC  
ATCCCTGACCCTTTAAATAGCTTAACTTTCATCAAGCAAGAGCCTACGACCAT  
ACCATGCTGAATATACCGGTTCTCGTCCGATCACCGAAGTCAAGCAGCATAAC  
CCGGG - 3'

**5S rDNA containing T<sub>3</sub>GT<sub>6</sub> element**

5' - GAATTCCAACGAATAACTTCCAGTGTGGTTTTTTGGATGACGTCATAAC  
ATCCCTGACCCTTTAAATAGCTTAACTTTCATCAAGCAAGAGCCTACGACCAT  
ACCATGCTGAATATACCGGTTCTCGTCCGATCACCGAAGTCAAGCAGCATAAC  
CCGGG - 3'

**5S rDNA containing T<sub>5</sub> element**

5' - GAATTCCAACGAATAACTTCCAGTGCAGACTTTTTGGATGACGTCATAAC  
ATCCCTGACCCTTTAAATAGCTTAACTTTCATCAAGCAAGAGCCTACGACCAT  
ACCATGCTGAATATACCGGTTCTCGTCCGATCACCGAAGTCAAGCAGCATAAC  
CCGGG - 3'

**5S rDNA containing T<sub>7</sub> element**

5' - GAATTCCAACGAATAACTTCCAGTGCAGTTTTTTTTGGATGACGTCATAAC  
ATCCCTGACCCTTTAAATAGCTTAACTTTCATCAAGCAAGAGCCTACGACCAT  
ACCATGCTGAATATACCGGTTCTCGTCCGATCACCGAAGTCAAGCAGCATAAC  
CCGGG - 3'

**PH05 N-2**

5' -  
TAGAACGCAACTGCACAATGCCAAAAAAGTAAAAAGTGATTA AAAAGAGTT  
AATTGAATAGGCAATCTCTAAATGAATCGATACAACCTTGGCACTCACACGT  
GGGACTAGCACAGACTAAATTTATGATTCTGGTCCCTGTTTTTCGAAGAGATCG  
CACATGCCAA - 3'
